# Supplementary material for: Sensing of transcription factor binding via cyanine dye pair fluorescence lifetime changes
Source: Royal Society of Chemistry journal article supplement (doi:10.1039/c2mb25057h), 2012-05-11
Supplement: c2mb25057h.pdf [file c2mb25057h.pdf]

**Table 1S.** ODN sequences (supplement to figures 4B and C)

| ODN Duplex | Sequences                                                                                      | b.p. distance and nucleotides | Absorbance spectra changes <sup>b)</sup> | Donor fluorescence intensity decrease, % <sup>c)</sup> | Acceptor fluorescence intensity change, % <sup>d)</sup> | Acceptor fluorescence intensity change, % <sup>e)</sup> |
|------------|------------------------------------------------------------------------------------------------|-------------------------------|------------------------------------------|--------------------------------------------------------|---------------------------------------------------------|---------------------------------------------------------|
| D9         | 5' <b>AGCCT</b> ⊗TGCAGTCACTA-C <b>ATCG</b> 3'<br>3' <b>TCGGA</b> -ACGTCAGTGAT⊗ <b>GTAGC</b> 5' | 10<br>T,T                     | -                                        | ND                                                     | ND                                                      | ND                                                      |
| D10        | 5' <b>AGCCTG</b> ⊗GAAAGTC-CCAC <b>ATCG</b> 3'<br>3' <b>TCGGAC</b> -CTTTCAG⊗GGT <b>GTAGC</b> 5' | 7<br>G,G                      | +                                        | 89.3                                                   | -86.6                                                   | -91.9                                                   |

a) ⊗ positions of donor and acceptor dyes linking to ODNs, blue – Cy5.5 (donor), green- 800CW, acceptor

b) + Indicates the presence of the absence of 640 nm absorbance peak

c) Fluorescence intensity change at 700nm (excited at 675nm) (%)

d) Fluorescence intensity change at 800nm (excited at 675nm) (%)

e) Fluorescence intensity change at 800nm (excited at 778nm) (%)

c,d,e The results are shown as mean±SD (n=2-3).

Phosphorothoates are shown in bold.

**Table 2S.** Fluorescence lifetimes measured at 650/716 band pass (donor dye Cy5.5) and 750/800 long pass (acceptor dye, 800CW and Cy7). The results are mean±SD (n=2).

| Fluorophore* | Free fluorophore, ns | Single-stranded ODN, ns | ODN duplex, ns |
|--------------|----------------------|-------------------------|----------------|
| Cy5.5        | 0.85±0.05            | 1.05±0.05               | 1.19±0.09      |
| 800CW        | 0.4±0.05             | 0.56±0.06               | 0.55±0.08      |
| Cy7          | 0.55±0.05            | 0.75±0.05               | 0.71±0.06      |

\* Fluorophore concentration – 75 nM in all experiments.
